# Supplementary material
Source: publisher site journal article supplement (https://www.dovepress.com/get_supplementary_file.php?f=486377.docx)
Supplement: Supplementary file 1 [file get_supplementary_file.php]

| Supplementary Table 1. The composition and content of CDHFD diet. | | | | |
| --- | --- | --- | --- | --- |
| **Ingredient** | **gm** |  | **Ingredient** | **gm** |
| Casein,80 Mesh | 0 |  | L-Tyrosine | 9.2 |
| L-Cystine | 4.2 |  | Corn Starch | 0 |
| L-Isoleucine | 7.6 |  | Maltodextrin 10 | 130.1 |
| L-Leucine | 15.8 |  | Sucrose | 68.8 |
| L-Lysine | 13.2 |  | Cellulose, BW200 | 50 |
| L-Methionine | 0.8 |  | Soybean Oil | 25 |
| L-Phenylalanine | 8.4 |  | Lard | 245 |
| L-Threonine | 7.2 |  | Mineral Mix S10026 | 10 |
| L-Tryptophan | 2.1 |  | DiCalcium Phosphate | 13 |
| L-Valine | 9.3 |  | Calcium Carbonate | 5.5 |
| L-Histidine | 4.6 |  | Potassium Citrate,1 H2O | 16.5 |
| L-Alanine | 5.1 |  | Sodium BiCarbonate | 7.5 |
| L-Arginine | 6 |  | Vitamin Mix V10001 | 10 |
| L-Aspartic Acid | 12.1 |  | Choline Bitartrate | 0 |
| L-Glutamic Acid | 38.2 |  | FD&C Yellow Dye #5 | 0 |
| Glycine | 3 |  | FD&C Red Dye #40 | 0.025 |
| L-Proline | 17.8 |  | FD&C Blue Dye #1 | 0.025 |
| L-Serine | 10 |  | Total | 756.05 |
